# Supplementary material for: Growth of idiomorphic LiMnPO4crystals in molten NaCl–KCl and LiF–NaCl–KCl fluxes
Source: Royal Society of Chemistry journal article supplement (doi:10.1039/c6ce02114j), 2016-11-14
Supplement: c6ce02114j1.pdf [file c6ce02114j1.pdf]

***Electronic Supplementary Information (ESI)***

**Growth of Idiomorphic LiMnPO<sub>4</sub> Crystals in Molten NaCl-KCl and LiF-NaCl-KCl fluxes**

Tetsuya Yamada,<sup>†</sup> Nobuyuki Zettsu,<sup>‡</sup> Shota Nozaki,<sup>‡</sup> Katsuya Teshima<sup>†,‡,\*</sup>

<sup>†</sup> Center for Energy and Environmental Science Shinshu University, 4-17-1 Wakasato, Nagano 380-8553, Japan

<sup>‡</sup> Department of Environmental Science & Technology, Faculty of Engineering, Shinshu University, 4-17-1 Wakasato, Nagano 380-8553, Japan

Contact address of corresponding author\*  
teshima@shinshu-u.ac.jp

Contents

Figure S1

SEM images and XRD profiles of precursor powder calcined at 400 °C for 3 h

Figure S2, 3

Particle size distribution of LiMnPO<sub>4</sub> crystals grown from binary and ternary halide fluxes at various solute concentrations

Figure S4

XRD pattern of single-crystal LiMnPO<sub>4</sub> grown from LiF-NaCl-KCl flux

Figure S5

XPS spectrum of LiMnPO<sub>4</sub> grown from LiF-NaCl-KCl flux

Figure S6

TG-DTA plots of precursor calcined with LiF-NaCl-KCl flux, and authentic LiF-NaCl-KCl flux

Figure S7

Time-dependent particle distribution of LiMnPO<sub>4</sub> crystals prepared at different holding times

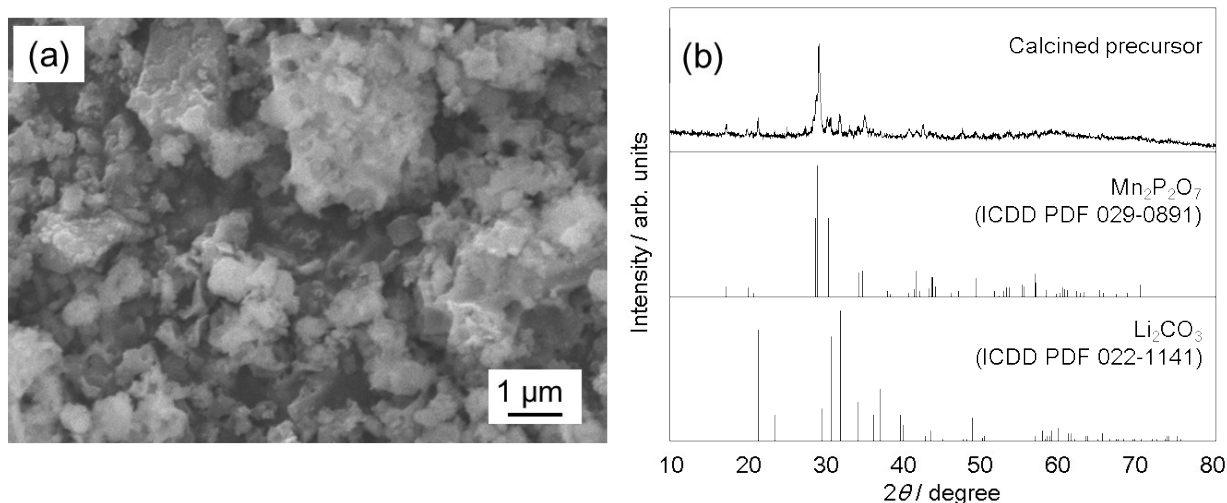

Figure S1. (a) SEM image and (b) XRD profile of pulverized precursor calcined at 400 °C for 3 h. XRD profiles of Mn<sub>2</sub>P<sub>2</sub>O<sub>7</sub> (ICDD PDF 029-0891) and Li<sub>2</sub>CO<sub>3</sub> (ICDD PDF 022-1141) are also shown for reference

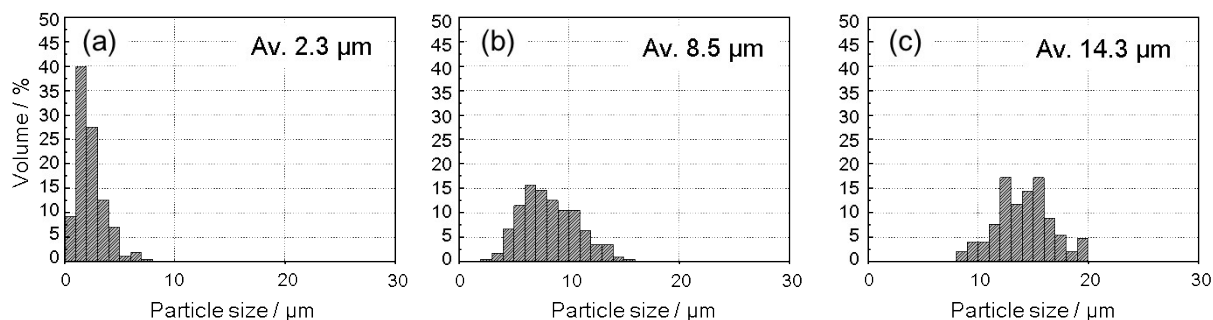

Figure S2. Particle size distribution of LiMnPO<sub>4</sub> crystals grown from NaCl-KCl mixed flux with solute concentrations of: (a) 50 (Run no.2), (b) 10 (Run no.3), and (c) 5 mol% (Run no.4).

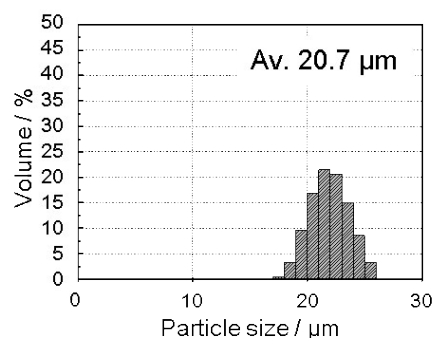

Figure S3. Particle size distribution of LiMnPO<sub>4</sub> crystal grown from LiF-NaCl-KCl mixed flux with solute concentration of 50 mol% (Run no.5).

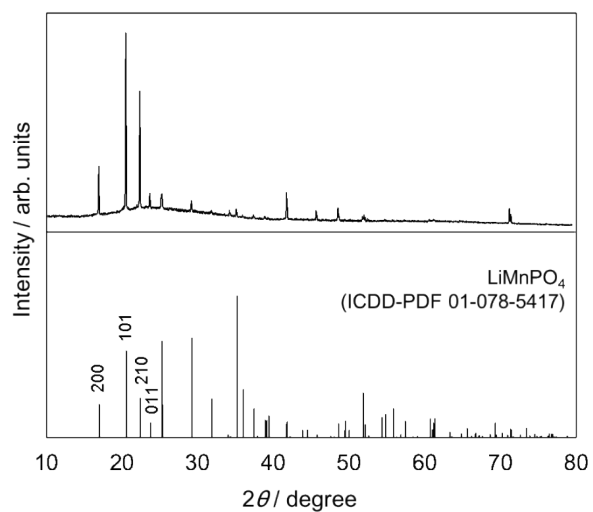

Figure S4. XRD patterns of non-pulverized  $\text{LiMnPO}_4$  crystal grown from  $\text{LiF-NaCl-KCl}$  mixed flux with a solute concentration of 50 mol% (Run no.5).

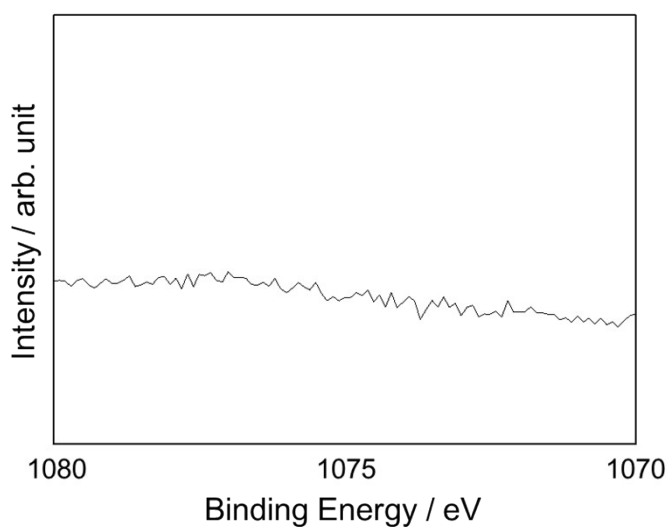

Figure S5. XPS spectra of Na 1s for  $\text{LiMnPO}_4$  crystal grown from  $\text{LiF-NaCl-KCl}$  mixed flux with solute concentration of 50 mol% (Run no.5).

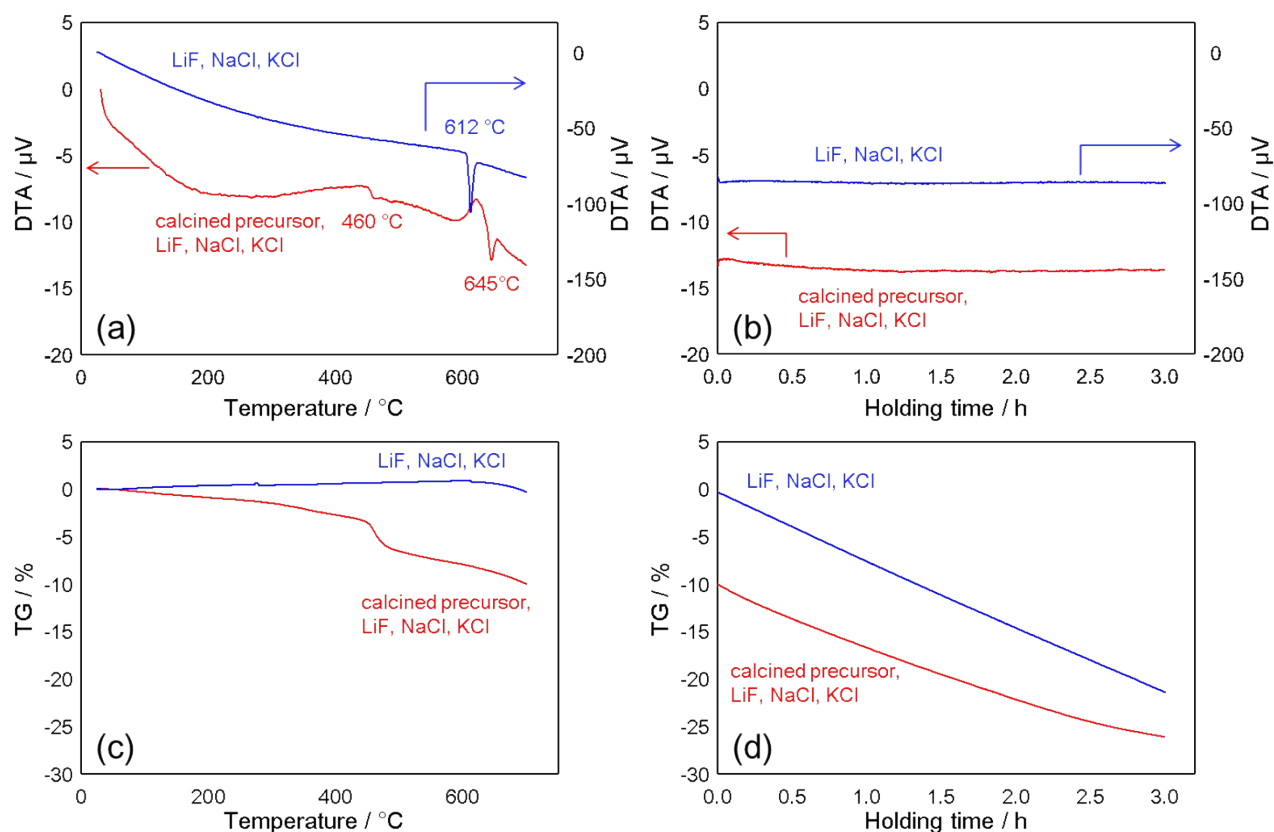

Figure S6. (a)(b)DTA and (c)(d)TG plots of a calcined precursor with LiF-NaCl-KCl flux at a solute concentration of 50 mol% and authentic LiF-NaCl-KCl flux during heating and holding at 700  $^{\circ}\text{C}$ . The molar ratio of each sample was referred to the condition in Run no. 5.

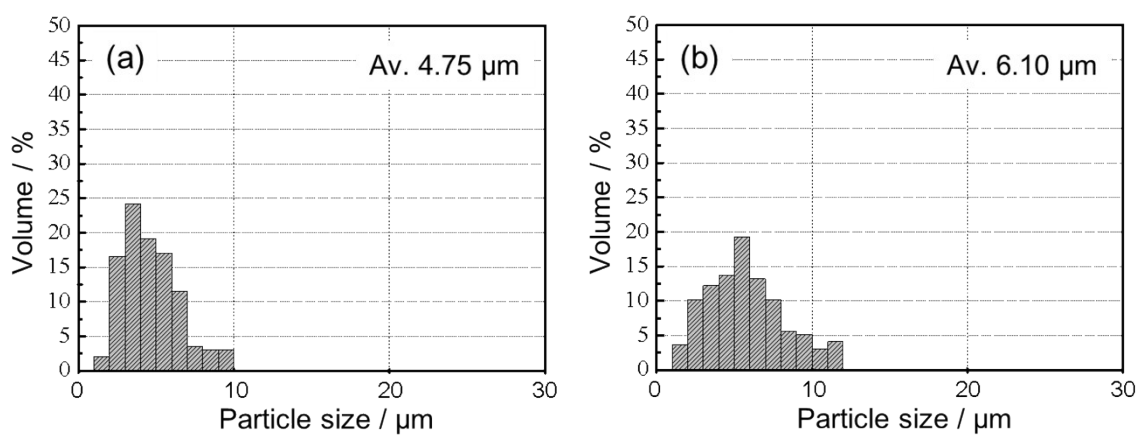

Figure S7. Particle distribution of LiMnPO<sub>4</sub> crystal grown from LiF-NaCl-KCl mixed flux with solute concentrations of 50 mol% for (a) 0 h (Run no.7) and (b) 1 h (Run no.8).
